1 **The reconstitution of body mass index in HIV positive subjects under**  
2 **antiretroviral treatment in Kinshasa**

3

4 Guyguy Kabundi Tshima<sup>1,2,3,4,\*</sup>, Paul Madishala Mulumba<sup>1,+ (deceased)</sup>

5 <sup>1</sup> Service de Parasitologie, Département de Médecine Tropicale, Maladies Infectieuses et  
6 Parasitaires, Faculté de Médecine, Université de Kinshasa, Democratic Republic of the Congo

7 <sup>2</sup> Alumnus of the Inter-University Diploma of HIV and AIDS of Ouagadougou University

8 <sup>3</sup> Alumnus of the Faculty of Bioscience Engineering of the Ghent University

9 <sup>4</sup> Free Student at the University of Montreal

10 \*Correspondence: [guyguytshimakabundi@gmail.com](mailto:guyguytshimakabundi@gmail.com) (G.K. Tshima)

11 <sup>+</sup> deceased

12 **WORD COUNT:** Abstract in English: **224**, in French: **250**, main manuscript: **3, 497**

13

14

15

16

17

18

## 19 **Abstract**

### 20 **Objective:**

21 We aimed to evaluate BMI changes in HIV adults' subjects in the first year of ART in malaria  
22 endemic areas.

### 23 **Methods:**

24 We used linear regression analysis showing that the change in weight at 12 months (y) in a  
25 malaria-endemic area is related to malaria infection at admission and its different episodes as  
26 illustrated by equation:  $y = a + bxi + \epsilon$ , where x is malaria on admission, i refers to episodes of  
27 clinical malaria infection during the year, b is the slope, a is a constant and  $\epsilon$  are confounding  
28 factors such as tuberculosis or poor eating habits.

### 29 **Results:**

30 We found a positive value for b ( $b = 0.697$ ), and this shows that weight loss at 12 months is  
31 correlated with the diagnosis of severe malaria at admission. In other words, severe malaria  
32 eliminates the weight gained under ART.

### 33 **Conclusions:**

34 1. Malaria is the leading cause of weight loss under ART.

35 2. Important recommendation for future:

36 This study suggests nutritional education based on local foods containing antioxidants to fight the  
37 oxidative stress generated by HIV and stimulated by *Plasmodium falciparum* during febrile  
38 episodes. Oxidative stress is blocked by NADPHase which is a metalloenzyme based on  
39 selenium.

40 Thus, to prevent a weight loss or the occurrence of the protein-energy malnutrition among people  
41 living with HIV, it is necessary to use the nutritional education.

## 42 **Résumé**

### 43 **Objectif:**

44 Nous voulions évaluer les modifications de l'IMC chez les patients VIH adultes au cours de la  
45 première année du traitement antirétroviral dans une zone d'endémie palustre

### 46 **Matériel et Méthodes:**

47 Nous avons utilisé une analyse de régression linéaire montrant que la variation de poids à 12  
48 mois ( $y$ ) dans une zone d'endémie palustre est liée à l'infection palustre à l'admission et à ses  
49 différents épisodes, comme l'illustre l'équation suivante:  $y = a + bxi + \epsilon$ , où  $x$  est le paludisme à  
50 l'admission,  $i$  les épisodes de paludisme clinique survenus au cours de l'année,  $b$  est la pente,  $a$   
51 est une constante et  $\epsilon$  sont des facteurs de confusion tels que la tuberculose ou de mauvaises  
52 habitudes alimentaires..

### 53 **Résultats:**

54 Nous avons trouvé une valeur positive pour  $b$  ( $b = 0,697$ ), ce qui montre que la perte de poids à  
55 12 mois est en corrélation avec le diagnostic de paludisme grave à l'admission. En d'autres  
56 termes, le paludisme grave élimine le poids gagné sous traitement antirétroviral.

### 57 **Conclusions:**

- 58 1. Le paludisme est la principale cause de perte de poids sous ARV.
- 59 2. Recommandation importante pour l'avenir : Cette étude suggère une éducation nutritionnelle  
60 basée sur des aliments locaux contenant des anti-oxydants pour lutter contre le stress oxydatif  
61 généré par le VIH et stimulé par le *Plasmodium falciparum* lors des poussées fébriles. Le stress

62 oxydatif est bloqué par la NADPHase qui est une métalloenzyme à base de sélénium. Ainsi, il est  
63 nécessaire d'utiliser l'éducation nutritionnelle pour prévenir la perte du poids sous ARV.

64

## 65 **Introduction**

66

67 For the investigation on weight evolution under ART in case of malaria being reported,  
68 worldwide in 2016, there were 36.7 million people living with HIV [1]. And in 2015, there were  
69 an estimated 214 million cases of malaria worldwide, and an estimated 438 000 deaths [1].  
70 Approximately 90% of all malaria deaths occur in Africa [2]. Since 2011 there was no WHO  
71 recommendation regarding any specific antimalarial treatment (AMT) for patients living with  
72 HIV in malaria areas [3], there is a need to explore the possibility of establishing specific  
73 guidelines for this category of patients co-infected with *Plasmodium falciparum*. The present  
74 work deals with the pending situation of co-infection HIV-malaria which remains a major public  
75 health problem in several countries worldwide [3].

76 A first step towards the physiopathology of the weight loss during the co-infection severe  
77 malaria-HIV because due to co-infection, the metabolic demands of antioxidant products such as  
78 selenium, vitamin C and vitamin E are increased. As a result, micronutrient deficiencies increase  
79 due to malaria and HIV [4].

80 The mechanisms of HIV oxidative stress and malaria progression can be explained in two ways:  
81 first, malaria stimulates NADPHase blocked by antiretroviral therapy, exposing the patient to  
82 weight loss, and elsewhere it has been shown that HIV-positive people and those infected with

83 malaria suffer from an oxidative / antioxidant imbalance [5]. Therefore, establishing the  
84 physiological balance between oxidants and antioxidant factors is of great therapeutic interest.

85 In this context, the implication of the present study is to evaluate the impact of severe malaria on  
86 weight change and the perspective is to design a nutrient (Selenium) that can help strengthen the  
87 immune state of HIV+ subjects to fight HIV-induced oxidative stress and *Plasmodium*  
88 *falciparum* during severe AIDS-malaria co-infection [6].

89 We expected dietary intake using local foods rich in antioxidants. A first step towards our  
90 research began with foods inquiry when in 2007, according to an American work, the daily intake  
91 of Selenium in the form of food supplements could even reduce the viral load in patients with  
92 HIV: a study of 262 patients, the antioxidant properties of Selenium would be responsible for this  
93 decrease. "An explanation that required confirmation," said the author [7]. Anyway, it was an  
94 interesting thought trail. "Selenium supplementation is a simple, safe and inexpensive approach"  
95 [7]. Not to mention that to refill Selenium, there are other solutions than the use of food  
96 supplements e.g. Seafood, Mushrooms. It would thus protect against cardiovascular diseases but,  
97 also, against certain digestive cancers [7] .

98 Several international works lend it interesting properties:

99 - Several investigators have found that HIV-infected patients have a compromised antioxidant  
100 defense system. Blood antioxidants are decreased, and the products of lipid and protein oxidation  
101 are increased in these patients. This may have physio pathological implications [8] ;

102 - Selenium supplementation affects specific populations of T lymphocytes and decreases the  
103 markers of lipoperoxides [9] ;

104 - Selenium plays an important role in the maintenance of immune function and neutralizes the  
105 superoxide ions produced by activated macrophages and neutrophils in response to the aggression  
106 of the body by microorganisms [10] .

107 So, the progression of HIV infection to the AIDS stage is due to the production of free radicals. It  
108 would be interesting to identify possible mechanisms and clinical trials to evaluate the effect of  
109 Selenium supplementation in the progression of HIV infection. The oxidative stress causes the  
110 production of cytokines that lead to cachexia [11] .

111 This study focuses on the reconstitution of weight in HIV positive patients under antiretroviral  
112 treatment (ART) in the environment of Kinshasa where patients living with HIV are combining  
113 the antiretroviral treatment (ART) and the antimalarial treatment (AMT) when they are diagnosed  
114 malaria positive with microscopy. The rationale for this study is to describe why they lose weight  
115 with a good observance on ART. What is the exposure factor?

## 116 **Methods and findings**

### 117 **Data collection**

118 We obtained weight, the individual CD<sub>4</sub> count and the diagnosis of severe malaria among adults  
119 in the Democratic Republic of the Congo using the 2007 AMOCONGO Kinshasa-Kasavubu  
120 Register HIV database. The AMOCONGO Kinshasa-Kasavubu 2007 database is a routinely  
121 collected health data which a product of the daily operations of the healthcare centre are collected  
122 independently of specific a priori research questions. The use of health data routinely collected in  
123 a prospective view is explained in those studies following the RECORD-PE [12-30]

### 124 **Ethical issues**

125 The University of Kinshasa ethic committee and the National Programme of AIDS estimated  
126 ethic to use the health data sampling in AMOCONGO Kinshasa-Kasavubu Register.

### 127 **BMI**

128 BMI is calculated using weight (kg) divided by squared height (m<sup>2</sup>). Weight and height were  
129 directly measured by AMOCONGO medical staff. Since our targeted samples are adults, we do  
130 not expect any significant variation in the height for twelve months that could affect the BMI.  
131 Therefore, only the change in weight is considered as a parameter that can be evaluated in the  
132 evolution of BMI. So, we replaced BMI by weight. Weight was reported as usual at the  
133 admission, at 3 months, at 6 months and at 12 months.

### 134 **Adequate logistic regression model**

135 Using Minitab software, we compute the binary logistic regression after the regression,  
136 confusion, and interaction assumptions. The probabilities greater than 5% means that the model is  
137 adequate.

### 138 **Limitations**

139 The following were limitations:

- 140 • Malaria access: only 1 or repeated access (HIV infection potentiates the frequency of  
141 access), it was necessary to distinguish between severe malaria and simple malaria
- 142 • The different ART regimes: Triomune-30, Triomune-40, Kaletra, ... It is known that  
143 certain molecules are leading to more resistance than others.
- 144 • The different antimalarial drugs used and antimalarial combinations: Quinine,  
145 Sulfadoxine-Pyrimethamine, Artesunate-Amodiaquine, Artemether-Lumefantrine, ...

- 146 • Nutritional education: distinguish between patients who have attended a nutrition  
147 education course and others who have not.
- 148 • Antibiotherapy: duration and frequency of treatment
- 149 • The date of last taking deworming medication: undernutrition can be controlled by  
150 intestinal worms (*Ascaris*, *Anguillules*, *Trichocephales*, ...). It would be interesting to note  
151 whether a stool examination was done or not
- 152 • Alcohol: plays an important role in the accumulation of fats
- 153 • Tobacco: makes you lose weight; distinguish between smokers and non-smokers
- 154 • HIV serologic status: consider the control group (HIV-)
- 155 • Marital status: married couples can have a regular diet compared to singles)
- 156 • ART duration: 3 months were sufficient to evaluate the recovery of the body mass index?
- 157 • CD4 lymphocyte count: broadly divided into two groups
- 158 \* Normal CD<sub>4</sub> level  $\geq 200$
- 159 \* Low CD<sub>4</sub> rate  $\leq 200$ : those are put on ART
- 160 - Associated opportunistic pathologies
- 161 • Social standing
- 162 • Age: Adults, the ideal would be to resort to children in vaccination period (0-5 years) to  
163 limit the confounding factors
- 164 • Number of CD<sub>4</sub> count for HIV-negative adults: we did not have data on the enumeration  
165 of CD<sub>4</sub> lymphocytes for HIV-negative adults.

166

167



168

169

170

171

172

173

174

175

176

## 177 **Results**

178

### 179 **Descriptive data**

#### 180 **Demographic characteristics of study participants**

181 Table 1 shows baseline characteristics of the Congolese adults.

182

| Age in years (n = 72) | Percentage | Mean (SD)   |
|-----------------------|------------|-------------|
| 21 < 29 years (n=22)  | 30.7%      | 32.6 (11.6) |
| 30-49 years (n =23)   | 32.1%      |             |
| 50-59 years (n=27)    | 37.2%      |             |
| ≥60 years (n = 0)     | 0%         |             |

183

184

**Table 1. Sample characteristics, age distribution.**

185 The final sample included 72 individuals, which expanded to 72 adults with 22 young adults 21

186 to 29 years old, in comparison to adults of 30 to 49 years old, of 50 to 59 years old. The average

187 age was 32.6 years (11.6). 37.2% (50-59 years) was the highest percentage; this means that  
188 experienced people are the most infected with HIV-AIDS. This is really a problem for a  
189 developing country like the DRC that needs experienced adult workers for its development.

190 Table 2 shows that the sex ratio was 4 women to 1 man. Apart from the biological reasons that  
191 would explain that the female genital area is larger than the male one and explain the  
192 vulnerability of the latter in unprotected sex. It is meanly meaning that Congolese women seek  
193 more help from health facilities than men for cultural reasons. Men want to see themselves strong  
194 and therefore not vulnerable to disease. Sick Guards are women most of the time, and for prenatal  
195 or pre-school clinics, women are more likely to attend the hospital than men. Congolese men  
196 refuse to ask for help in the first symptoms of the disease, they first want to fight alone so,  
197 logically with a weakened body the expected mortality rate should be higher in men than in  
198 women because they will be treated later, with the higher risk of death following the natural  
199 course of the disease.

200

| Sex (n <sub>total</sub> =72) | Percentage (n <sub>total</sub> =72) |
|------------------------------|-------------------------------------|
| Men (n=15)                   | 21% (n/n <sub>total</sub> )         |
| Women (n=57)                 | 79% (n/n <sub>total</sub> )         |

201

202

**Table 2. Repartition of sex**

203

204

### **Significance of logistic regression model after analysis of health data**

205 Table 3 showed a p-value > 0.05, at this level we cannot draw a conclusion because it has no  
206 scientific value, so we did linear regression to try to show a correlation between the effect of  
207 severe malaria on the number of CD<sub>4</sub> and the decrease in weight. Due to the binary logistic



228 **Linear regression model: highlighted how was the exclusive effect of severe**  
229 **malaria**

230 According to our statistical results, we have retained only 2 variables: response variable (Y) =  
231 Initial weight-Weight at 12 months; Predictive variable 1 ( $X_1$ ) = diagnosis of severe malaria.  
232 Finally, the equation retained was:  $Y = a + b_1X_1$

233 **The Retained Predictor variable**

234 Table 5 shows the retained predictive variable. We made our decision at an  $\alpha = 0.05$  level of  
235 significance i.e. if the p-value is  $<0.05$ , we reject the null hypothesis and otherwise we keep it.  
236 Since p is still very weak ( $p = 0.00005$ ), the conclusion of a positive linear relation was even be  
237 declared very strongly.

238

239

240

| Predictor      | P       | Null Hyp    | Decision     | Conclusion                                                                                                 |
|----------------|---------|-------------|--------------|------------------------------------------------------------------------------------------------------------|
| Constant       | 0.011   | $\beta_0=0$ | Retain $H_0$ | The constant appears to be zero. Even so, we leave it in the model                                         |
| Severe malaria | 0.00005 | $\beta_1=0$ | Reject $H_0$ | Severe malaria infection at admission can significantly contribute to explain the weight lost at 12 months |

241

242

**Table 5. Retained predictor variable.**

243

244 **Retained predictor variable: severe malaria**

245 The regression equation was: weight loss at 12 months = 15.3 + 0.697 diagnosis of severe  
246 malaria. We can use it for estimation purposes: we found  $y = 15.3 + 0.697X$  i.e. through linear  
247 regression the weight at the admission and 12 months was correlated with the effect of severe  
248 malaria.

249 **Interpreting the Linear Regression Model after consulting health data**

250 The interpretation of the model is as follows: for each episode of severe malaria, the weekly  
251 averages of weight loss are in the order of 0.697 kg. Based on these forecasts of a weekly weight  
252 loss of 0.697 kg with a severe malaria episode, clinicians need to think what to suggest  
253 compensating for this, for us we suggest the maize, sorghum and soy.

254 There are correlations between the weight loss at 12 months under ART and the diagnosis of  
255 severe malaria on admission.  $R = 61.7\%$  i.e. > 50%: this means that the variables explain the  
256 model at 61.7%. So, the model is good. The equation is a good predictor.

257

258 **Correlation between weight at 12 months on ART and severe malaria at**  
259 **admission**

260 Table 6 showed the correlation between weight at 12 months on ART and severe malaria on  
261 admission. We see how the constant is 15,288 and the slope  $b$  is = 0.6973, this is the coefficient  
262 of severe malaria. In this case, because our p-value is <0.05 (Table 4), we confirm that there is a  
263 correlation between weight at 12 months on ART and severe malaria on admission. And how to  
264 say that we have a good model for the prediction? It is by the coefficient of determination  $R^2$ . The

265 coefficient of determination  $R^2 = 0.617$ . Thus, only about 62% of the total variability in weight  
266 loss at 12 months under ART in the sample is explained by the linear regression relationship  
267 following energy expenditure because of severe malaria on the weight.

268

| Predictor                | Coef   | SE Coef | T    | P       |
|--------------------------|--------|---------|------|---------|
| Constant                 | 15.288 | 5.624   | 2.72 | 0.011   |
| Severe malaria infection | 0.6973 | 0.1003  | 6.95 | 0.00005 |

269

270

**Table 6. Analysis of table of coefficients of linear regression.**

271

272 This example illustrates that there is no contradiction in finding other variables that contribute to  
273 weight loss called predictive variables  $X_i$ , i.e.:  $X_1$  = severe malaria;  $X_2$  = Weight on admission;  $X_3$   
274 =  $CD_4 / \mu l$ ;  $X_4$  = co-infection HIV / severe malaria,  $X_{i+j} = (5)$  diabetes, (6) cirrhosis, (7)  
275 tuberculosis, (8) cancer, (9) age, (10) poverty, (11) poor nutritional status, (12) helminths, etc.

276 From 9, 10, 11 predictive variables, there is really a conceptual problem to include all of them in  
277 the model.

278

279

### 280 **Consequence of such situation**

281 One consequence of such a situation may be that clinicians should prevent episodes of malaria in  
282 HIV + patients living in malaria endemic areas.

### 283 **Analysis of variance for the four moments of weight measurement: 0, 3, 6 and 12** 284 **months**

285 ANOVA was used to check for significant differences in variables and in different time periods.  
286 The significant level was set at  $p < 0.05$ . Table 7 shows that the probability (0.591) is greater than  
287 0.05; there is therefore no significant difference between the average of four weights. Using  
288 ANOVA, we find that the four means of weight were not significantly different.  
289

| Source         | DF  | SS      | MS    | F    | P     |
|----------------|-----|---------|-------|------|-------|
| Regression     | 3   | 129.15  | 43.05 | 0.64 | 0.591 |
| Residual Error | 124 | 8350.46 | 67.34 |      |       |
| Total          | 127 | 8479.61 |       |      |       |

290 **Table 7. Analysis of variance for the four moments of weight measurement: 0, 3, 6 and 12**  
291 **months**

292

293 **Confounding factors**

294 Not evaluated: The role of poverty and bad nutritional status as confounding factors, the role of  
295 other dysimmunities comorbidities (diabetic, cirrhose...).

296 **83% of patients have not seen their weight increase**

297 This is what was observed in the health data consulted, which underlines the need for a  
298 supplement and other antimalarial measures, lifestyle, diet following the second specific  
299 objective.

### 300 **Repetition of malaria episodes based on the number of CD4 / $\mu$ l at admission**

301 In sum, there is no statistically significant interaction of the diagnosis of severe malaria on the  
302 number of CD<sub>4</sub> <50 cells /  $\mu$ l on admission, although it has been observed in some individual  
303 cases.

### 304 **The effect of clinical malaria infection on weight**

305 Based on our example of 72 observations, we make predictions of the effect of clinical malaria  
306 infection on weight.

307 We identified more than 7 episodes of severe malaria (30%) and a CD<sub>4</sub> count <50 cells /  $\mu$ l in the  
308 subgroup whose weight did not increase in the first year under ART.

309 The other subgroup whose subjects had gained weight in 12 months under ART had 5% of severe  
310 malaria attacks and a CD<sub>4</sub> count > 50 cells /  $\mu$ l. CD<sub>4</sub> with less than 7 malaria episodes per year.

311 HIV infection increases the repetition of clinical malaria episodes, which could be associated  
312 with weight loss.

313 Our results emphasized that the accurate assessment of the effect of clinical malaria on HIV-  
314 infected people is limited by the lack of rigorous diagnostic criteria and the definition of what  
315 may be considered malaria.

316 If the thick-film had been made and was a test with the highest sensitivity-specificity and number  
317 of parasites /  $\mu$ l of blood, patients could have a parasitaemia that coincides with the fever of



318 another origin (such as opportunistic infections, bacterial diseases such as *Streptococcus*  
319 *pneumoniae*, *Salmonella typhi* species or not).

## 320 **Discussion**

321

### 322 **Key results with reference to study objectives**

323 The health data from a sample of 72 participants of AMOCONGO Kinshasa Kasavubu HIV  
324 Register show overall, in the whole group (including the HIV + subgroup whose weight did not  
325 increase in the first year on ART and the subgroup who gained weight), the ANOVA admission,  
326 at 3 months, at 6 months and at 12 months later the four weight averages are not significantly  
327 different. So, there is on average no significant weight change in the first year under ART. We  
328 conclude that severe malaria is the cause of weight loss and should be controlled by the  
329 preventive treatment of malaria. Whence continuous treatment of malaria in a HIV positive  
330 subject (with therapeutic antimalarials intermittent treatment) will help prevent weight loss by  
331 decreasing the parasite biomass buried in the deep organs (liver, spleen, brain, kidney) therefore  
332 not detectable at the peripheral level with the examination of the thick drop.

### 333 **Outcomes of the study**

334 The present study aimed to determine the relationship between severe malaria and HIV among  
335 HIV+ adults living in malaria endemic area as Kinshasa in the Democratic Republic of the Congo  
336 and their clinic expression in the weight loss. About malaria definition based on clinical signs,  
337 this study is in conformity with Flateau [3] and Rogier [32]: Flateau affirms that because of the  
338 absence of malaria rigorous diagnostic criteria, the precise evaluation of the effect of malaria in  
339 HIV-infected patients is limited [3]. Rogier said that it is difficult to define malaria although its  
340 epidemiological data are known [32]. For us the rigorous diagnostic criteria are a positive  
341 microscopic test before treatment and the disappearance of admissions symptoms after the AMT

342 as we stated that malaria is a retrospective diagnosis using health data. It means that when a  
343 person presents malaria symptoms you never know if it's malaria or not. It is only after the  
344 treatment that you'll get the answer because of co-infections.

345 According to the malaria management our study agrees to wait for microscopy results before  
346 starting the treatment. We found for 10 years (2000-2009) only 32% of malaria positives samples  
347 in a study that we evaluated in Kinshasa University Hospital about malaria microscopic diagnosis  
348 [35]. For us in area of high endemicity of malaria, a treatment should begin with a serious sign as  
349 fever (39-40°C), positive microscopic test and anemia that may be malaria for an adult with HIV  
350 living in high malaria endemicity area. Although if the microscopic test is negative, the fever can  
351 have another origin such as bacterial diseases particularly tuberculosis, *Streptococcus pneumoniae*,  
352 non-typhi Salmonella species and other opportunistic diseases.

353 As the malaria mortality is increasing with the severity of immunosuppression (low CD cells /  $\mu$ l)  
354 [3], this study suggests treating malaria if CD<sub>4</sub><50 cells /  $\mu$ l in malaria area with clinical signs and  
355 malaria microscopic positive test according to our observation of the health data. We chose our  
356 sample based on physician's diagnosis made with severe malaria symptoms as fever and anemia.  
357

### 358 **Malaria episodes and HIV infection**

359 The present study identified more than 7 episodes (30%) of severe malaria with a number of  
360 CD<sub>4</sub><50 cells/ $\mu$ l in the sub-group who lost weight in the first year of ART. The other subgroup  
361 who gains weight had 5% of 1 to 7 malaria episodes. In Nigeria Amuta observed that in people  
362 living with HIV and AIDS, the prevalence of malaria was low when CD<sub>4</sub> counts increased and it  
363 was increased when CD<sub>4</sub> was low [31]. In a prospective study in South Africa, HIV-infected

364 people had an increased risk of severe malaria by 4 times, and the prevalence of severe malaria  
365 was the highest when the CD<sub>4</sub> cell count was less than 200 cells per  $\mu$ l [3]. In subgroup analyses,  
366 HIV infection was associated with an increased risk of severe malaria in non-immune, but not in  
367 semi-immune people [3].

### 368 **Conceptual Model □ on the associations between malaria, HIV and weight** 369 **changes**

370 The conceptual model explains the physiopathology of the co-infection HIV-MALARIA. In one  
371 hand malaria stimulate the NADPHase blocked by the ART making that a HIV+ people under  
372 ART can lose weight during malaria crisis. In the other hand the key of that physiopathology is  
373 relative to the endothelium equilibrium to establish between oxidants and anti-oxidants factors as  
374 selenium in the cellular level.

### 375 **Therapeutic nutrition**

376 In view of the above, we recommend that therapeutic nutrition be included in the overall strategy  
377 to combat HIV-*Plasmodium* co-infection.

378

379

### 380 **Conclusions**

381 Based on these forecasts of a weekly weight loss of 0.697 kg with a severe malaria episode, we  
382 suggest the consideration of the NADPH oxidase in the physiopathology of the co-infection HIV-  
383 malaria for therapeutic relevance using local foods rich in Selenium. Excluding other variables,  
384 malaria is the main cause of weight loss under ART in Kinshasa. We found that health data that  
385 reports longitudinal data adhere to generally accepted Prospective Study definition.

386 **Declaration of conflict of interest**

387 None

388 **Acknowledgments**

389 None.

390

391 **References**

392

393 1. Dolan K., Wirtz A.L., Moazen B., Ndeffo-Mbah M., Galvani A., Kinner S.A., Courtney R.,  
394 McKee M., Amon J.J., Maher L., Hellard M., Beyrer C., Altice F. Global burden of HIV,  
395 viral hepatitis, and tuberculosis in prisoners and detainees. *Lancet* 2016, Vol: 388, Issue:  
396 10049, Page: 1089-1102. Google scholar

397 2. Hemingway J., Ranson H., Magill A., Kolaczinski J., Fornadel C., Gimnig J., Coetzee M.,  
398 Simard F., Roch DK., Hinzoumbe CK, Pickett J., David Schellenb D., Peter Gething, Mark  
399 Hoppé, Nicholas Hamon. Averting a malaria disaster: will insecticide resistance derail  
400 malaria control? *Lancet* 2016; 387: 1785–88. Google scholar

401 3. Flateau CG., Le loup G. et Pialoux G. Consequences of HIV infection on malaria and  
402 therapeutic implications: a systematic review. *Lancet Infect Dis.* 2011;11:541-56. Google  
403 scholar

404 4. Orish VN. *et al.* The effects of malaria and HIV co-infection on hemoglobin levels among  
405 pregnant women in Sekondi-Takoradi, Ghana. *International Journal of Gynecology and*  
406 *Obstetrics.* 2013;120:236-239. Google scholar

- 407 5. Osuji FN. *et al.* Antioxidant activity in HIV and malaria co-infected subjects in Anambra  
408 State, southeastern Nigeria. *Asian Pacific Journal of Tropical Medicine.* 2012 ; 842-847.  
409 Google scholar
- 410 6. Tshima KG, Mulumba MP, Odio WT, D'Haese L, Remaut Dewinter A.M. Nine months  
411 supplementation with Selenium and nutrition education for people living with HIV/AIDS in  
412 Democratic Republic of Congo, PhD Project, Ghent University, 2007
- 413 7. <http://fr.news.yahoo/22012007/185/quand-lanutrition-aide-combattre-le-vih.html>.
- 414 8. Fuchs J, Schöfer H, Milbradt R, Freisleben HJ, Buhl R, Siems W, Grune T. Studies on lipoate  
415 effects on blood redox state in human immunodeficiency virus infected  
416 patients. *Arzneimittelforschung.* 1993;43(12):1359-62. Pubmed
- 417 9. Patrick L. Nutrients and HIV: part one -- beta carotene and selenium. *Altern Med Rev.* 1999  
418 ;4(6):403-13. Pubmed
- 419 10. Constans J, Delmas-Beauvieux MC, Sergeant C, Peuchant E, Pellegrin JL, Pellegrin I, Clerc  
420 M, Fleury H, Simonoff M, Leng B, Conri C. One-year antioxidant supplementation with beta-  
421 carotene or selenium for patients infected with human immunodeficiency virus: a pilot  
422 study. *Clin Infect Dis.* 1996 ;23(3):654-6. Pubmed
- 423 11. Baum MK, Shor-Posner G. Micronutrient status in relationship to mortality in HIV-1  
424 disease. *Nutr Rev.* 1998 ;56(1 Pt 2): S135-9. Pubmed
- 425 12. Langan SM, Schmidt SAJ, K Wing, V Ehrenstein, SG Nicholls, KB Filion, O Klungel, I  
426 Petersen, HT Sorensen, WG Dixon, A Guttman, K Harron, LG Hemkens, D Moher, S  
427 Schneeweiss, L Smeeth, M Sturkenboom, E von Elm, SV Wang, EI Benchimol. The reporting of  
428 studies conducted using observational routinely collected health data statement for  
429 pharmacoepidemiology (RECORD-PE) *BMJ* 2018;363: k3532. Google Scholar

- 430  
431 13. Benchimol EI, Smeeth L, Guttman A, et al, RECORD Working Committee. The REporting  
432 of studies Conducted using Observational Routinely-collected health Data (RECORD) statement.  
433 *PLoS Med* 2015;12:e1001885. 10.1371/journal.pmed.1001885. Google scholar
- 434 14. Spasoff R. *Epidemiologic methods for health policy*. Oxford University Press, 1999. Google  
435 scholar
- 436 15. Mor A, Petersen I, Sørensen HT, Thomsen RW. Metformin and other glucose-lowering drug  
437 initiation and rates of community based antibiotic use and hospital-treated infections in patients  
438 with type 2 diabetes: a Danish nationwide population-based cohort study. *BMJ Open*  
439 2016;6:e011523. 10.1136/bmjopen-2016-011523. Google scholar
- 440 16. Nørgaard M, Johnsen SP. How can the research potential of the clinical quality databases be  
441 maximized? The Danish experience. *J Intern Med* 2016; 279:132-40. doi:10.1111/joim.12437.  
442 Google scholar
- 443 17. <http://www.chups.jussieu.fr/poly/biostats/poly/POLY.Chp.15.4.html> consultation of  
444 28/10/2015
- 445 18. Hemkens LG, Contopoulos-Ioannidis DG, Ioannidis JP. Current use of routinely collected  
446 health data to complement randomized controlled trials: a meta-epidemiological survey. *CMAJ*  
447 *Open* 2016;4:E132-40.doi:10.9778/cmajo.20150036
- 448 19. Moher D, Glasziou P, Chalmers I, et al. Increasing value and reducing waste in biomedical  
449 research: who's listening? *Lancet* 2016;387:1573-86. doi:10.1016/S0140-6736(15)00307-4
- 450 20. Canadian Institutes of Health Research. *Canada's strategy for patient-oriented research.*  
451 *Improving health outcomes through evidence informed care*. Canadian Institutes of Health  
452 Research, 2011.

- 453 21. Hoffman S, Podgurski A. The use and misuse of biomedical data: is bigger really better? *Am*  
454 *J Law Med* 2013;39:497-538.doi:10.1177/00988588130390040
- 455 22. Cohen IG, Amarasingham R, Shah A, Xie B, Lo B. The legal and ethical concerns that arise  
456 from using complex predictive analytics in healthcare. *Health Aff (Millwood)* 2014;33:1139-47.  
457 doi:10.1377/ hlthaff.2014.0048
- 458 23. Benchimol EI, Manuel DG, To T, Griffiths AM, Rabeneck L, Guttman A. Development and  
459 use of reporting guidelines for assessing the quality of validation studies of health administrative  
460 data. *J Clin Epidemiol* 2011; 64:821-9. doi: 10.1016/j.jclinepi.2010.10.006
- 461 24. Hemkens LG, Benchimol EI, Langan SM, et al. The reporting of studies using routinely  
462 collected health data was often insufficient. *J Clin Epidemiol* 2016; 79:104-11. doi:10.1016/j.  
463 jclinepi.2016.06.005
- 464 25. Wang SV, Verpillat P, Rassen JA, Patrick A, Garry EM, Bartels DB. Transparency and  
465 reproducibility of observational cohort studies using large healthcare databases. *Clin Pharmacol*  
466 *Ther* 2016; 99:325- 32. doi:10.1002/cpt.329
- 467 26. Nzongola-Ntaladja G. The Congo from Leopold to Kabila: A People's History. In *AIDS in*  
468 *Africa*; 2002. Google scholar
- 469 27. Brittain V. Calvary of the women of Eastern Democratic Republic of Congo. In *HIV and*  
470 *AIDS in Africa*; 2002. Google scholar
- 471 28. Aminake MN. et al. Synthesis and evaluation of hybrid drugs for a potential HIV/AIDS-  
472 malaria combination therapy. *Bioorg. Med. Chem.* 2012; 20:277-5289. Google scholar
- 473 29. Van Geertruyden JP., Mulenga M., Mwananyanda L. et al. HIV-1 immune suppression and  
474 antimalarial treatment outcome in Zambian adults with uncomplicated malaria. *J Infect Dis.*  
475 2006; 194: 917. Google scholar

- 476 30. Mermin J., Ekwaru JP., Liechty CA., et al. Effect of co-trimoxazole prophylaxis, antiretroviral  
477 therapy, and insecticide-treated bednets on the frequency of malaria in HIV-1-infected adults in  
478 Uganda: a prospective cohort study. *Lancet*. 2006; 367:1256–1261. Google scholar
- 479 31. Amuta EU., Houmsou RS., Diya AW. Malarial infection among HIV patients on  
480 antiretroviral therapy (ART) and not on ART: a case study of Federal Medical Centre Makurdi,  
481 Benue State, Nigeria. *Asian Pacific Journal of Tropical Biomedicine* 2012: S378-S381. Google  
482 scholar.
- 483 32. Rogier C. , Salet G. Modélisation du paludisme. *Med Trop* 2004 : 64 :89-97. Google scholar
- 484 33. Basto-Abreu A, Braverman-Bronstein A, Camacho-García-Formenti D, Zepeda-Tello R,  
485 Popkin BM, Rivera-Dommarco J, et al. (2018) Expected changes in obesity after reformulation to  
486 reduce added sugars in beverages: A modeling study. *PLoS Med* 15(10): e1002664. [https://doi.](https://doi.org/10.1371/journal.pmed.1002664)  
487 [org/10.1371/journal.pmed.1002664](https://doi.org/10.1371/journal.pmed.1002664)
- 488 34. Thas O., Applied Statistics for the food sciences, Faculty of agricultural and applied  
489 biological sciences, Department of Applied Mathematics, Biometrics and Process Control, Ghent  
490 University. 2006.
- 491 35. Tshima KG. Bio-distribution of *Plasmodium* in Kinshasa: Experience of the Unit of  
492 Parasitology of the University Hospital of Kinshasa, Dissertation, 2010.
